# Supplementary material for: DUX4 expression in cancer induces a metastable early embryonic totipotent program
Source: PubMed Central journal article supplement — Cell Rep. Author manuscript; Available in PMC 2023 Oct 16. (PMC10578318; doi:10.1016/j.celrep.2023.113114), 2023-09-08
Supplement: NIHMS1933912-supplement-1.pdf [file NIHMS1933912-supplement-1.pdf]

**Cell Reports, Volume 42**

**Supplemental information**

**DUX4 expression in cancer induces  
a metastable early embryonic totipotent program**

**Andrew A. Smith, Yee Nip, Sean R. Bennett, Danielle C. Hamm, Richard J.L.F. Lemmers, Patrick J. van der Vliet, Manu Setty, Silvère M. van der Maarel, and Stephen J. Tapscott**

Figure S1

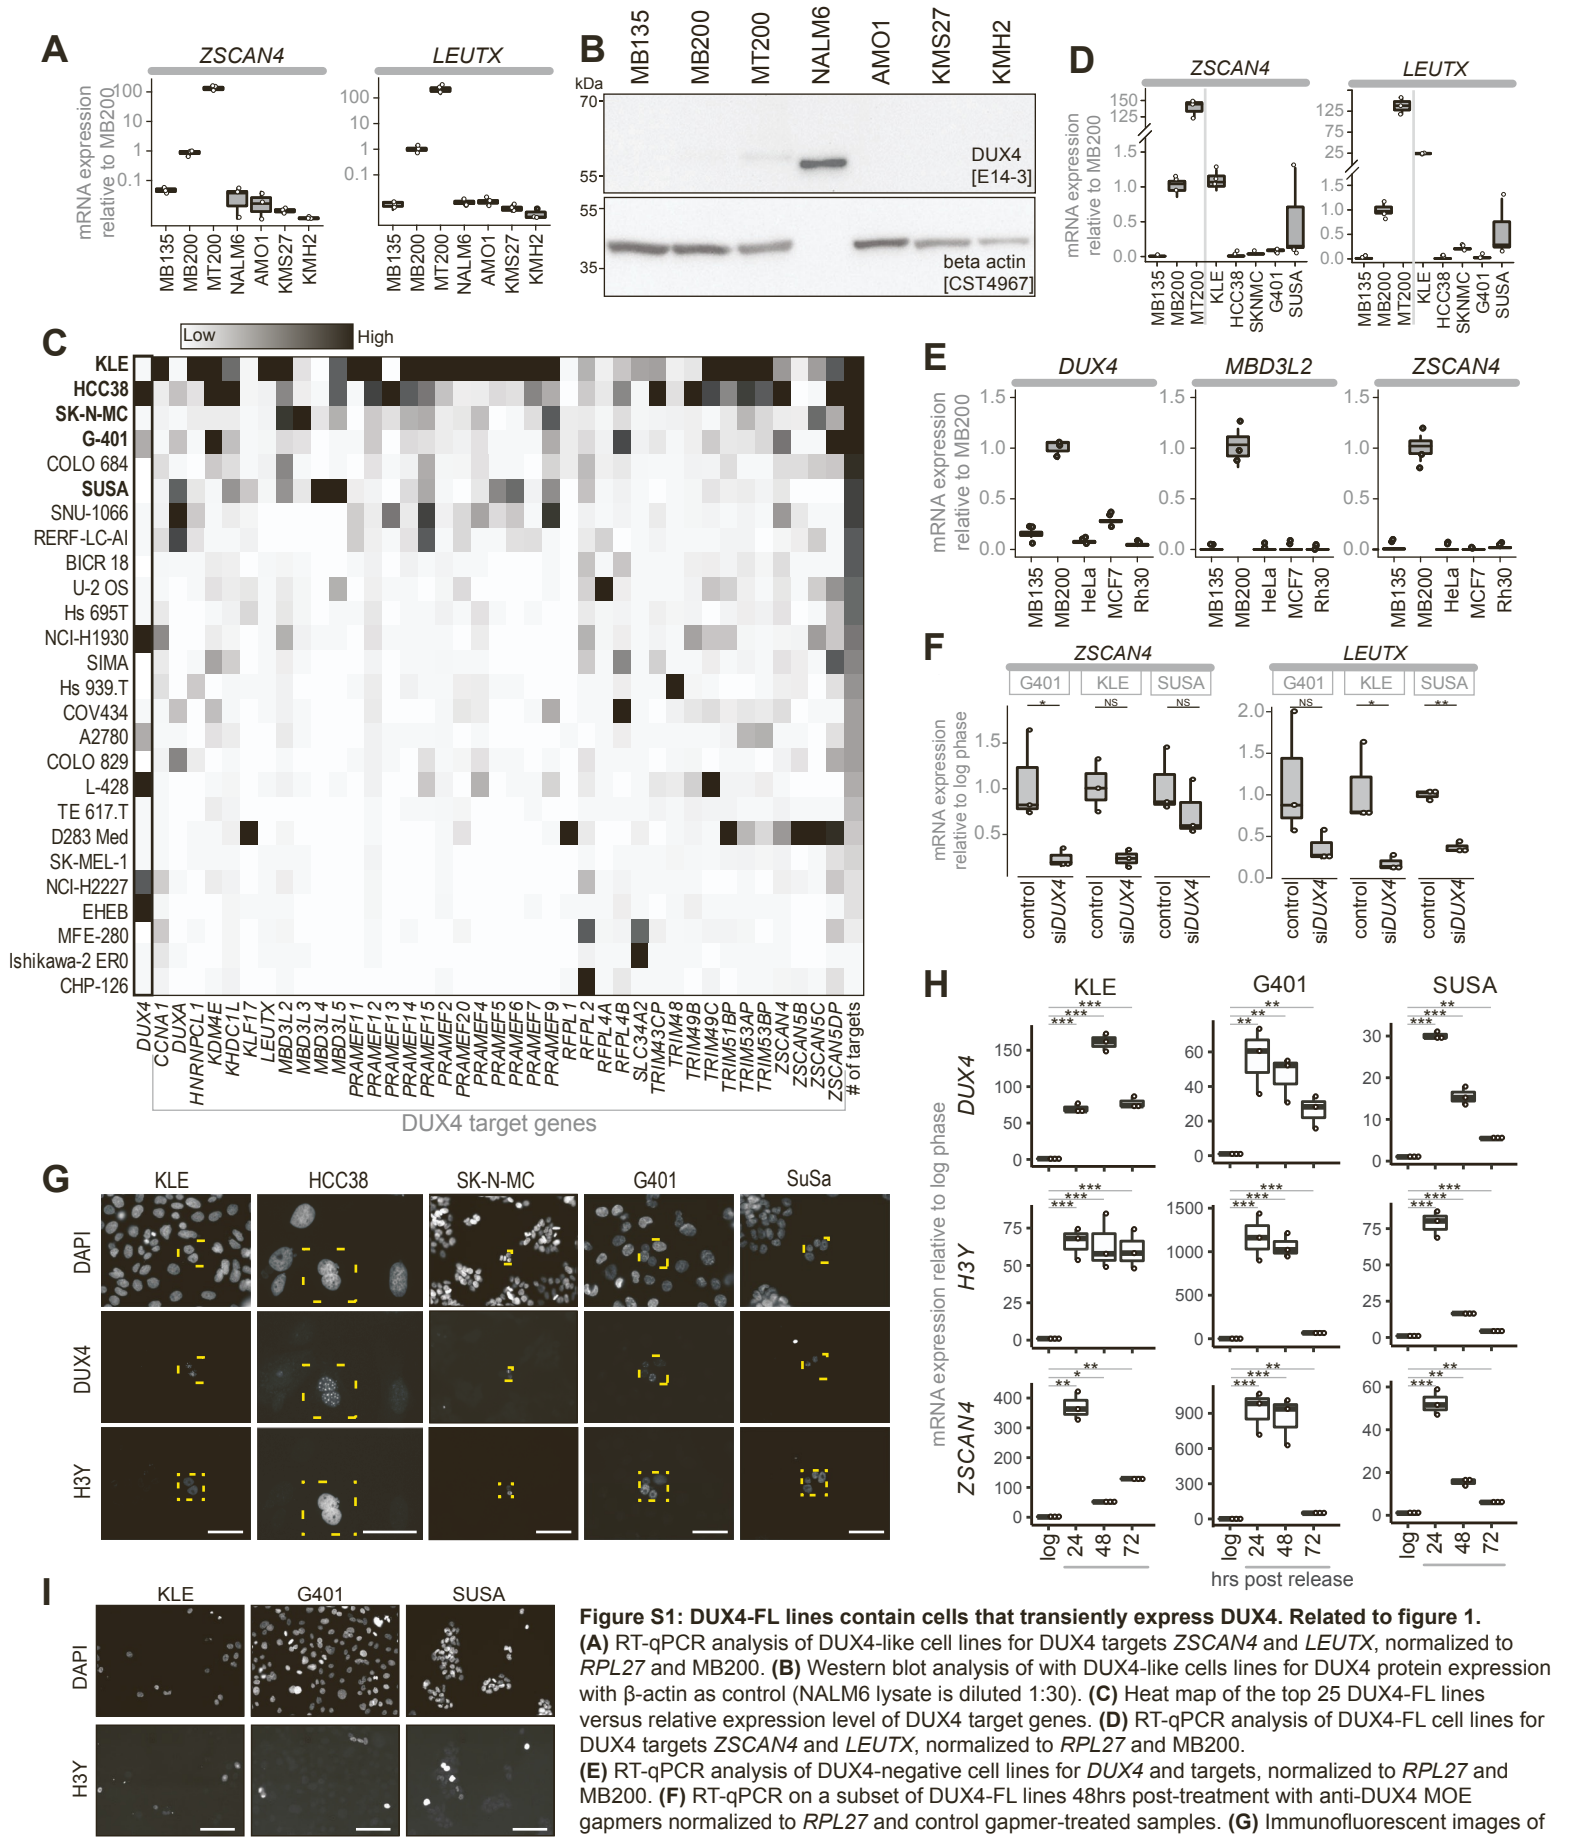

**Figure S1: DUX4-FL lines contain cells that transiently express DUX4. Related to figure 1.**  
**(A)** RT-qPCR analysis of DUX4-like cell lines for DUX4 targets *ZSCAN4* and *LEUTX*, normalized to *RPL27* and MB200. **(B)** Western blot analysis of with DUX4-like cells lines for DUX4 protein expression with  $\beta$ -actin as control (NALM6 lysate is diluted 1:30). **(C)** Heat map of the top 25 DUX4-FL lines versus relative expression level of DUX4 target genes. **(D)** RT-qPCR analysis of DUX4-FL cell lines for DUX4 targets *ZSCAN4* and *LEUTX*, normalized to *RPL27* and MB200. **(E)** RT-qPCR analysis of DUX4-negative cell lines for *DUX4* and targets, normalized to *RPL27* and MB200. **(F)** RT-qPCR on a subset of DUX4-FL lines 48hrs post-treatment with anti-DUX4 MOE gupmers normalized to *RPL27* and control gupmer-treated samples. **(G)** Immunofluorescent images of DUX4-FL lines stained for DUX4 [E14-3] and H3Y [6H8-2111] showing a larger field of the images in main Figure 1D; yellow dashed line = cropped region. **(H)** RTqPCR on a subset of DUX4-FL lines after release from confluence. **(I)** Immunofluorescence for H3Y in DUX4-FL lines post-release from a confluent state. Scale bars = 200uM. For all RTqPCR experiments, n=3 biological replicates. P-values: \* < 0.05; \*\*<0.005, \*\*\*<0.0005, NS = no significance, calculated with one-tailed Welch's t-tests..

Figure S2

A

|                | n_cells | n_genes | n_counts | total_counts_mt | pct_counts_mt | total_counts_ribo |
|----------------|---------|---------|----------|-----------------|---------------|-------------------|
| KLE_Log_Rep1   | 5356.00 | 5166.93 | 34940.29 | 1551.58         | 4.28          | 7625.58           |
| KLE_24hr_Rep1  | 5931.00 | 4248.62 | 20620.63 | 1013.40         | 5.36          | 3451.28           |
| KLE_48hr_Rep1  | 9837.00 | 3674.60 | 14841.59 | 624.79          | 4.50          | 2441.77           |
| KLE_72hr_Rep1  | 7839.00 | 3493.04 | 15343.70 | 762.26          | 4.97          | 2596.92           |
| SuSa_Log_Rep1  | 3573.00 | 4516.80 | 28812.00 | 1737.70         | 5.71          | 7513.20           |
| SuSa_24hr_Rep1 | 3531.00 | 3189.04 | 15931.64 | 589.33          | 5.91          | 4021.80           |
| SuSa_48hr_Rep1 | 2814.00 | 3791.63 | 26066.28 | 1358.23         | 4.73          | 6310.09           |
| SuSa_72hr_Rep1 | 3304.00 | 3994.35 | 20853.99 | 1497.83         | 6.57          | 4808.30           |

B

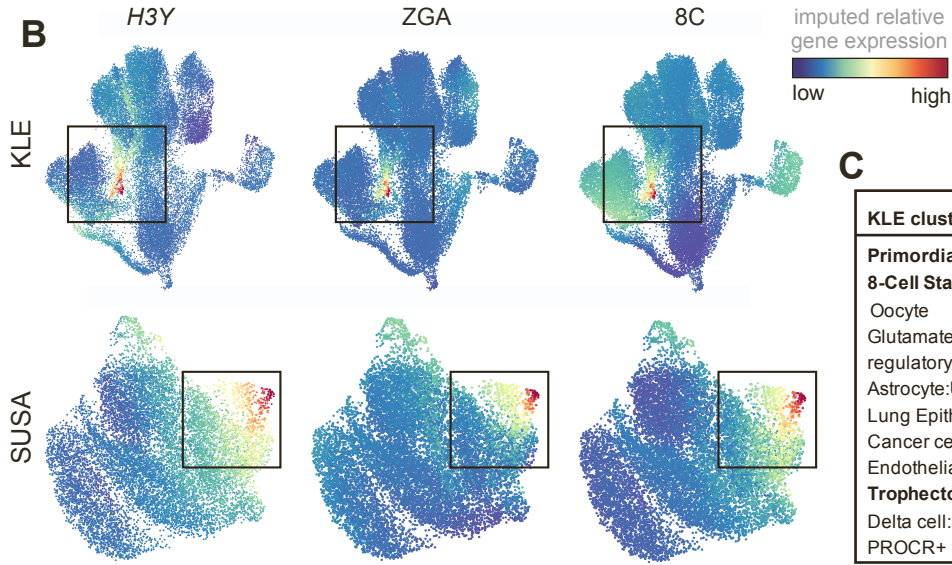

C

| CellMarker_Augmented_2021                     |                                            |
|-----------------------------------------------|--------------------------------------------|
| KLE cluster 14 upregulated                    | SUSA cluster 16 upregulated                |
| <b>Primordial Germ cell</b>                   | Epithelial cell:Corneal Epithelium         |
| <b>8-Cell Stage Cell (Blastomere): Embryo</b> | Astrocyte:Brain                            |
| Oocyte                                        | Microglial cell:Embryonic Prefontal cortex |
| Glutamatergic neuron:Undefined                | Monocyte:Fetal Kidney                      |
| regulatory T (Treg) cell                      | Natural Killer (T) cell:Fetal Kidney       |
| Astrocyte:Undefined                           | Dicidual cell                              |
| Lung Epithelial cell:Lung                     | Pancreatic Polypeptide cell                |
| Cancer cell:undefined                         | <b>8-Cell Stage Cell (Blastomere)</b>      |
| Endothelial cell:Fetal gonad                  | Brush Cell (Tuft cell)                     |
| <b>Trophectoderm cell: Embryo</b>             | Neuroendocrine cell                        |
| Delta cell:Pancreas                           | Mitotic Arrest Phase Fetal Germ cell       |
| PROCR+ Progenitor cell                        | <b>Primordial Germ Cell</b>                |

D

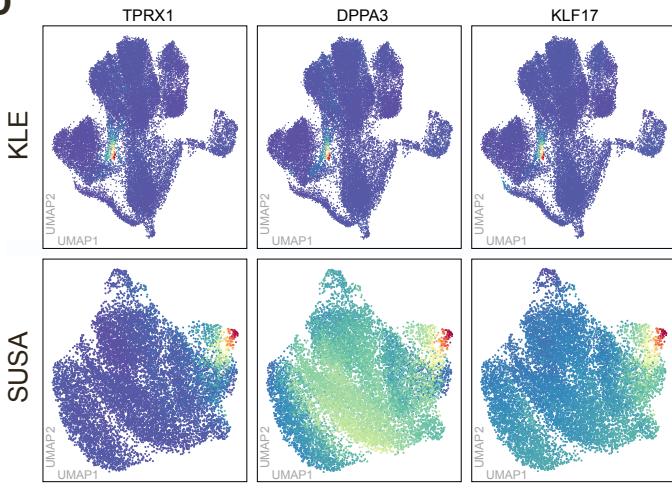

E

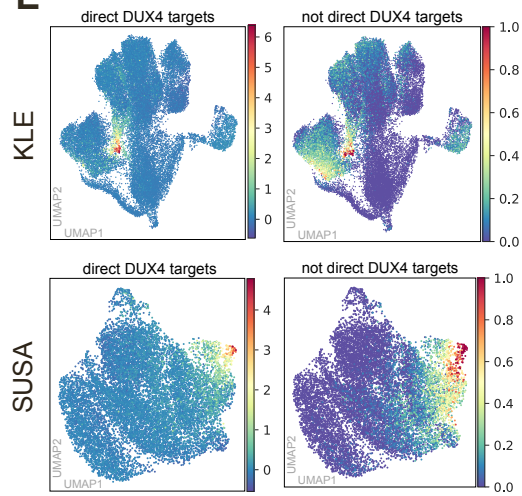

F

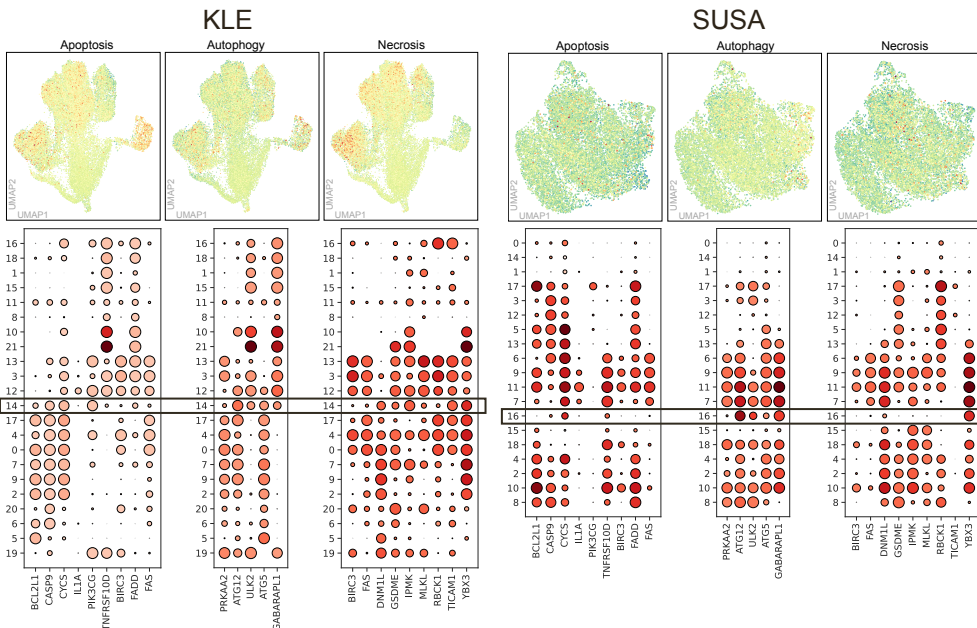

**Figure S2: DUX4 activates ZGA and 8CLC programs, but does not affect cell death. Related to Figure 2.**

(A) Mean single-cell RNA-sequencing cell counts processed with ScanPy.

(B) Full UMAPs indicated that are shown in Fig 2B.

(C) Most significant EnrichR Cell Marker expression patterns for KLE and SUSa.

(D) Single-cell RNA-seq as UMAPs demonstrating relative expression of indicated 8C genes.

(E) Single cell RNA-sequencing UMAPs demonstrating relative expression of 8CLC gene identified as direct targets of DUX4 or as not direct targets of DUX4.

(F) Single-cell RNA-seq as UMAPs and dot plots of relative expression of composite scores for the indicated cell death pathways.

Figure S3

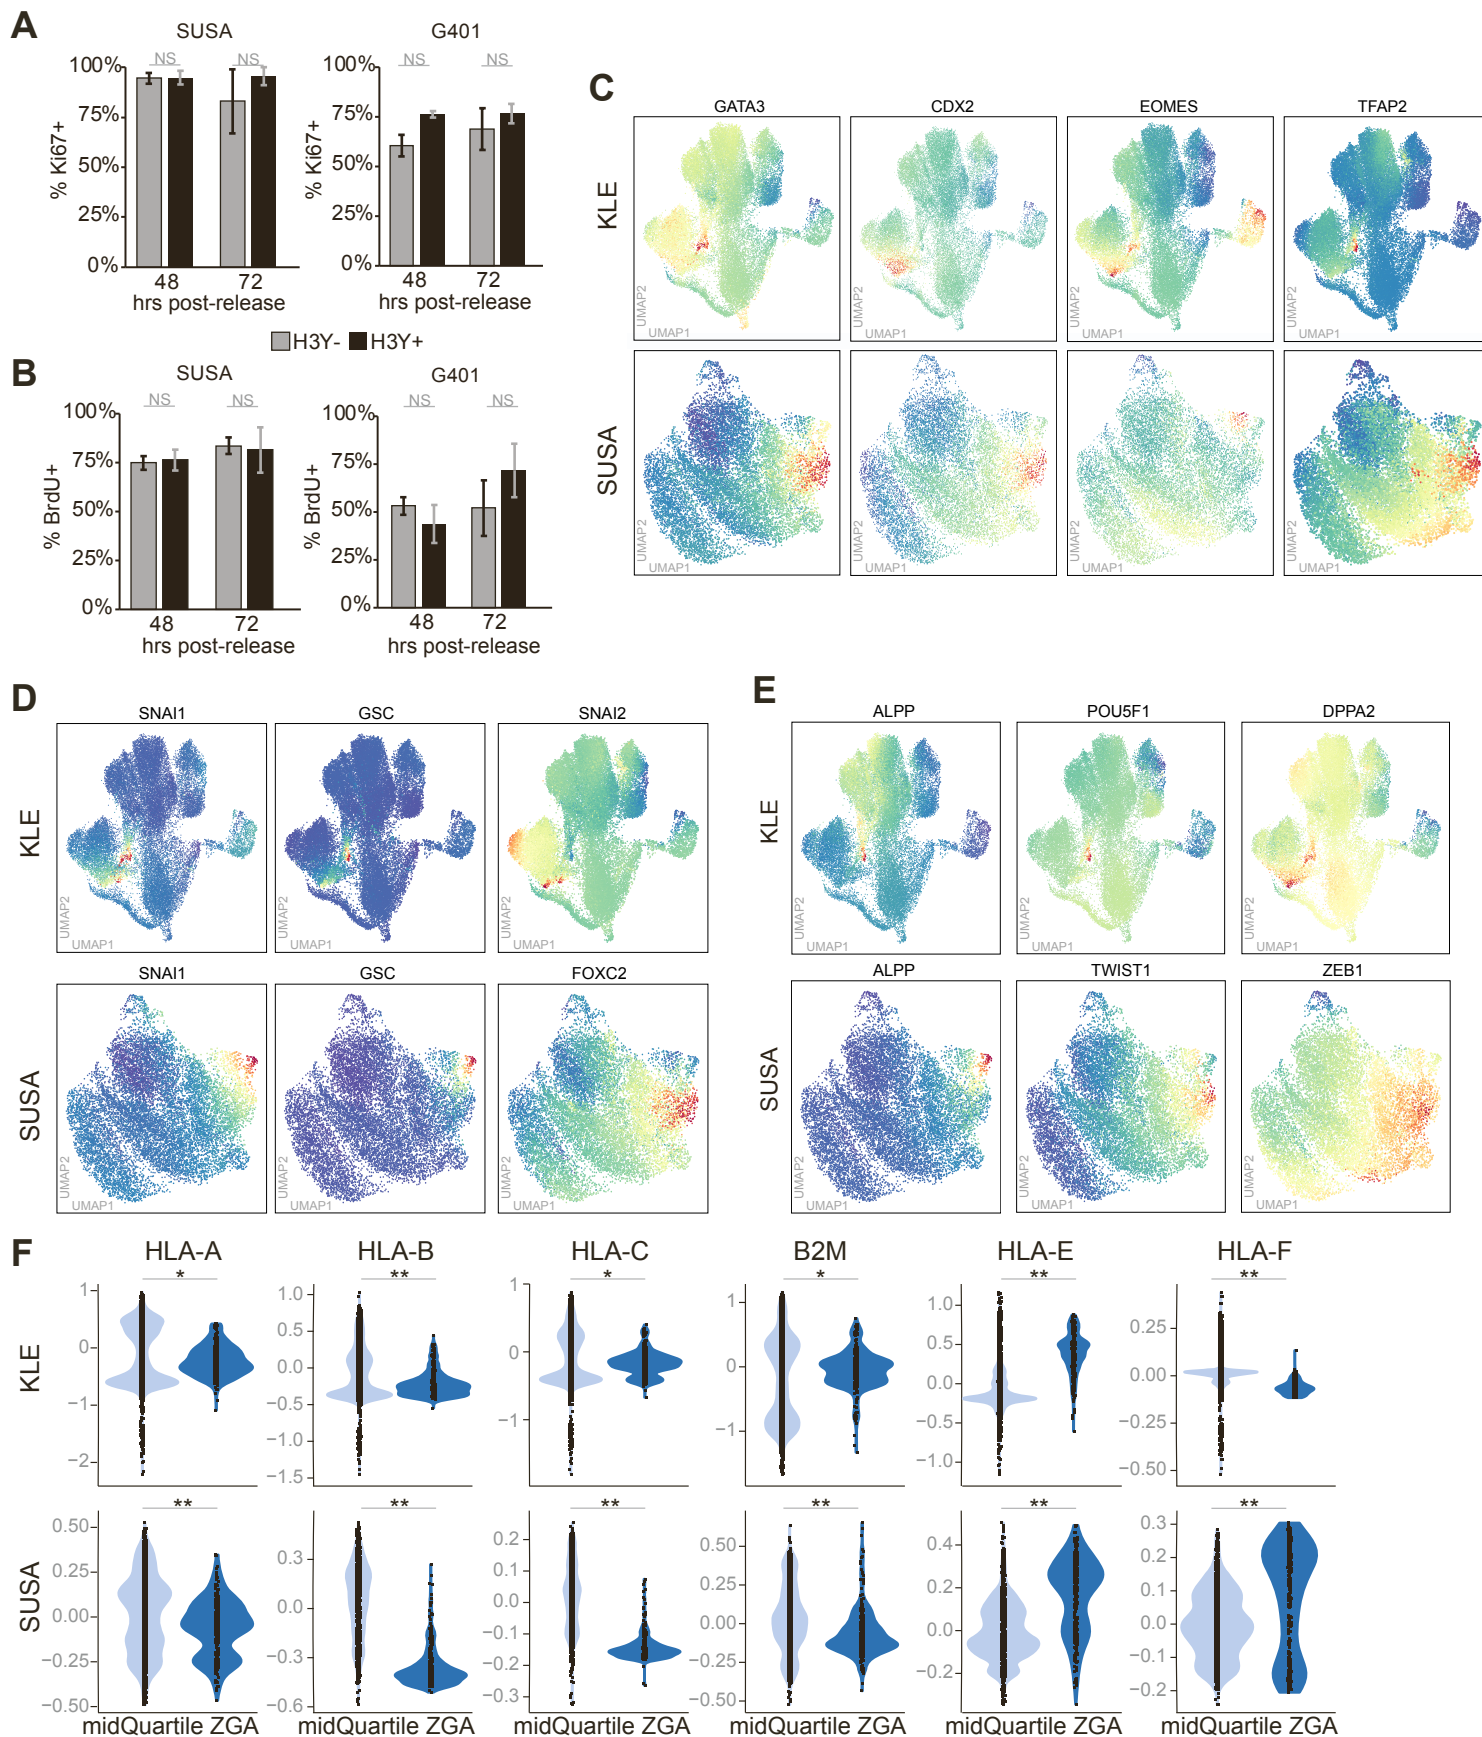

**Figure S3: DUX4 does not affect cell division, but activates early embryonic genes and suppresses MHC-I. Related to Figure 2.**  
**(A-B)** Immunofluorescent quantification of (A) Ki67+ or (B) BrdU+ cells after release from confluence, n= 3 separate experiments; >240 cells per timepoint; expressed as mean +SD.  
**(C-E)** Single-cell RNA-seq as UMAPs of relative expression of composite scores for the indicated genes.  
**(F)** Violin plots comparing HLA gene expression in the mid quartile or top 350 cells based on imputed ZGA gene composite scores.  
P-values: \* < 0.05; \*\*<0.005, \*\*\*<0.0005, NS = no significance, calculated with a one-tailed welch's t-test.

Figure S4

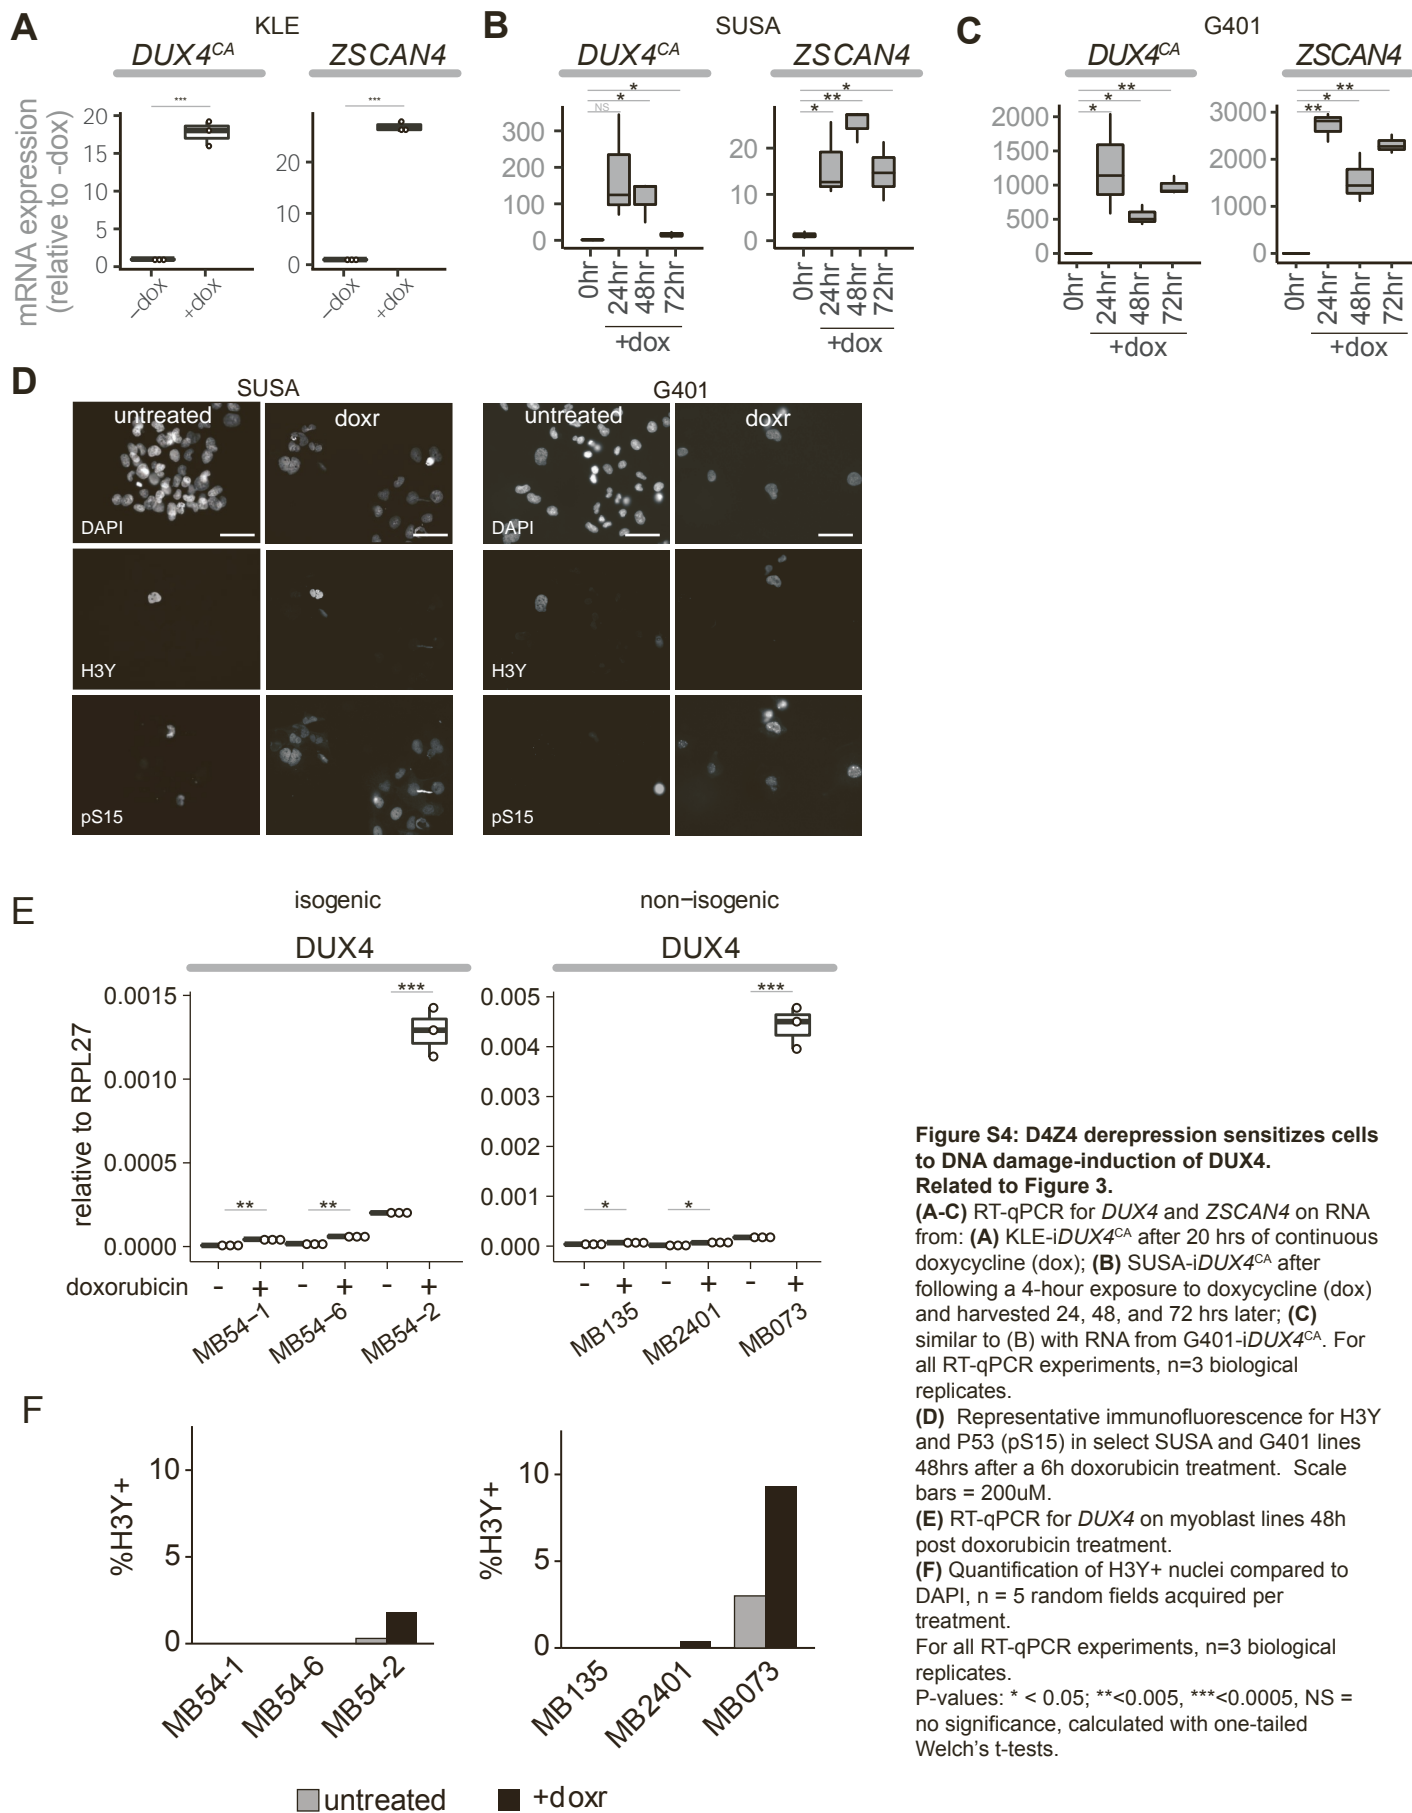

**Figure S4: D4Z4 derepression sensitizes cells to DNA damage-induction of DUX4. Related to Figure 3.**

(A-C) RT-qPCR for *DUX4* and *ZSCAN4* on RNA from: (A) KLE-*iDUX4<sup>CA</sup>* after 20 hrs of continuous doxycycline (dox); (B) SUSAs-*iDUX4<sup>CA</sup>* after following a 4-hour exposure to doxycycline (dox) and harvested 24, 48, and 72 hrs later; (C) similar to (B) with RNA from G401-*iDUX4<sup>CA</sup>*. For all RT-qPCR experiments, n=3 biological replicates.

(D) Representative immunofluorescence for H3Y and P53 (pS15) in select SUSAs and G401 lines 48hrs after a 6h doxorubicin treatment. Scale bars = 200uM.

(E) RT-qPCR for *DUX4* on myoblast lines 48h post doxorubicin treatment.

(F) Quantification of H3Y+ nuclei compared to DAPI, n = 5 random fields acquired per treatment.

For all RT-qPCR experiments, n=3 biological replicates.

P-values: \* < 0.05; \*\* < 0.005, \*\*\* < 0.0005, NS = no significance, calculated with one-tailed Welch's t-tests.
